# Supplementary material
Source: PubMed Central journal article supplement (PMC5373450)
Supplement: ASN.2016040407SupplementaryData.pdf [file ASN.2016040407SupplementaryData.pdf]

**Supplemental Table 1.** Baseline characteristics per treatment sequence

| Characteristics                           | Treatment sequence* |                   |                   |                  |
|-------------------------------------------|---------------------|-------------------|-------------------|------------------|
|                                           | A (n=9)             | B (n=12)          | C (n=12)          | D (n=12)         |
| Age, years                                | 54.5 ± 15.8         | 53.2 ± 16.3       | 52.6 ± 10.7       | 46.9 ± 10.4      |
| Male sex, n (%)                           | 7 (78)              | 8 (67)            | 10 (83)           | 8 (67)           |
| White ethnicity, n (%)                    | 9 (100)             | 12 (100)          | 12 (100)          | 12 (100)         |
| Body mass index, kg/m <sup>2</sup>        | 29.2 ± 4.8          | 26.6 ± 3.2        | 28.2 ± 4.5        | 28.5 ± 5.9       |
| Renal diagnosis                           |                     |                   |                   |                  |
| IgA nephropathy, n (%)                    | 1 (11)              | 4 (33)            | 2 (17)            | 2 (17)           |
| Focal segmental glomerulosclerosis, n (%) | 3 (33)              | 2 (17)            | 1 (8)             | 2 (17)           |
| Membranous nephropathy, n (%)             | 2 (22)              | 2 (17)            | 1 (8)             | 3 (25)           |
| Hypertensive nephropathy, n (%)           | 1 (11)              | 0 (0)             | 2 (17)            | 1 (8)            |
| Other/Inconclusive, n (%)                 | 2 (22)              | 4 (33)            | 6 (50)            | 4 (33)           |
| Season                                    |                     |                   |                   |                  |
| Winter, n (%)                             | 1 (11)              | 3 (25)            | 4 (33)            | 3 (25)           |
| Spring, n (%)                             | 2 (22)              | 4 (33)            | 3 (25)            | 1 (8)            |
| Summer, n (%)                             | 3 (33)              | 4 (33)            | 4 (33)            | 8 (67)           |
| Autumn, n (%)                             | 3 (33)              | 1 (8)             | 1 (8)             | 0 (0)            |
| Medication use†                           |                     |                   |                   |                  |
| ACE inhibitor, n (%)                      | 9 (100)             | 12 (100)          | 12 (100)          | 12 (100)         |
| β-blocker, n (%)                          | 2 (22)              | 2 (17)            | 4 (33)            | 4 (33)           |
| Calcium channel blocker, n (%)            | 1 (11)              | 5 (42)            | 5 (42)            | 3 (25)           |
| α-blocker, n (%)                          | 1 (11)              | 0 (0)             | 1 (8)             | 1 (8)            |
| Diuretic, n (%)                           | 4 (44)              | 2 (17)            | 2 (17)            | 4 (33)           |
| Lipid lowering agent, n (%)               | 6 (67)              | 6 (50)            | 7 (58)            | 5 (42)           |
| Systolic blood pressure, mmHg             | 126 ± 15            | 125 ± 9           | 125 ± 11          | 126 ± 9          |
| Diastolic blood pressure, mmHg            | 77 ± 10             | 76 ± 6            | 77 ± 7            | 76 ± 9           |
| eGFR (CKD-EPI), ml/min/1.73m <sup>2</sup> | 73 ± 17             | 71 ± 30           | 65 ± 23           | 70 ± 23          |
| Calcium, mmol/L                           | 2.36 ± 0.12         | 2.35 ± 0.11       | 2.36 ± 0.09       | 2.36 ± 0.11      |
| Phosphate, mmol/L‡                        | 0.86 ± 0.17         | 0.94 ± 0.14       | 0.87 ± 0.20       | 1.07 ± 0.11      |
| Albuminuria, mg/24h                       | 1,372 [822-2,290]   | 1,154 [654-2,037] | 1,295 [783-2,143] | 951 [561-1,612]  |
| Urinary protein excretion, g/24h          | 1.59 [0.96-2.65]    | 1.45 [0.88-2.39]  | 1.56 [0.99-2.44]  | 1.19 [0.77-1.83] |
| Urinary sodium excretion, mmol/24h        | 173 ± 56            | 192 ± 25          | 160 ± 45          | 175 ± 104        |

|                              |          |         |         |          |
|------------------------------|----------|---------|---------|----------|
| Creatinine clearance, mL/min | 106 ± 24 | 99 ± 43 | 99 ± 36 | 100 ± 47 |
|------------------------------|----------|---------|---------|----------|

\* A= placebo-regular sodium diet, paricalcitol-regular sodium diet, placebo-sodium restriction diet, paricalcitol-sodium restriction diet.; B= paricalcitol-regular sodium diet, placebo-regular sodium diet, paricalcitol-sodium restriction diet, placebo- sodium restriction diet; C= placebo-sodium restriction diet, paricalcitol-sodium restriction diet, placebo-regular sodium diet, paricalcitol-regular sodium diet; D= paricalcitol-sodium restriction diet, placebo-sodium restriction diet, paricalcitol-regular sodium diet, placebo-regular sodium diet.

Data are presented as mean ± SD, geometric mean [95% CI], and number (percentage) for normally, skewed distributed data, and nominal data, respectively. Differences between the four sequences were assessed with ANOVA for normally distributed continuous data, the Kruskal-Wallis test for skewed distributed data, and the  $\chi^2$  test for nominal data. †  $P < 0.05$ . ‡ At the end of the run-in period, all patients were treated with ramipril 10 mg once daily, except for one patient who received ramipril 5 mg due to low blood pressure. In one patient, diuretic therapy was stopped during the study and later on resumed because of oedema. In another patient the calcium channel blocker was stopped due to symptomatic hypotension. All other non-study-related medication was kept stable during the study periods.

**Supplemental Table 2.** Adverse effects possibly or probably related to treatment

|                                                                                      | Regular sodium diet |                        | Sodium restriction diet |                        |
|--------------------------------------------------------------------------------------|---------------------|------------------------|-------------------------|------------------------|
|                                                                                      | Placebo<br>N = 44   | Paricalcitol<br>N = 44 | Placebo<br>N = 43       | Paricalcitol<br>N = 43 |
| <b>Laboratory</b>                                                                    |                     |                        |                         |                        |
| Hypercalcaemia<br><i>corrected calcium &gt; 2.60 mmol/L</i>                          | 4                   | 3                      | 2                       | 8                      |
| Hypoparathyroidism<br><i>PTH &lt; 1.5 pmol/L</i>                                     | 0                   | 2                      | 0                       | 2                      |
| Elevated liver enzymes<br><i>ASAT &gt; 40 U/L, ALAT &gt; 45 U/L, GGT &gt; 50 U/L</i> | 9                   | 14                     | 8                       | 7                      |
| Anaemia                                                                              | 0                   | 0                      | 1                       | 1                      |
| Acute-on-chronic kidney disease                                                      | 0                   | 0                      | 0                       | 1                      |
| Hyperkalaemia<br><i>potassium &gt; 5.0 mmol/L</i>                                    | 2                   | 3                      | 4                       | 5                      |
| Hypokalaemia<br><i>potassium &lt; 3.50 mmol/L</i>                                    | 0                   | 2                      | 0                       | 0                      |
| Hyponatraemia<br><i>sodium &lt; 135 mmol/L</i>                                       | 1                   | 0                      | 1                       | 0                      |
| Hypophosphataemia<br><i>phosphate &lt; 0.80 mmol/L</i>                               | 10                  | 5                      | 6                       | 2                      |
| Hypocalcaemia<br><i>corrected calcium &lt; 2.20 mmol/L</i>                           | 2                   | 2                      | 3                       | 1                      |
| Elevated alkaline phosphatase<br><i>ALP &gt; 150 U/L</i>                             | 0                   | 1                      | 2                       | 0                      |
| Worsening hypothyroidism                                                             | 0                   | 1                      | 0                       | 0                      |
| Rhabdomyolysis                                                                       | 0                   | 1                      | 0                       | 0                      |
| <b>Physical</b>                                                                      |                     |                        |                         |                        |
| Peripheral oedema                                                                    | 13                  | 12                     | 8                       | 5                      |
| De novo atrial fibrillation                                                          | 0                   | 0                      | 1                       | 0                      |
| Foot drop                                                                            | 0                   | 0                      | 1                       | 0                      |
| Peripheral artery occlusive disease (Fontaine IIB)                                   | 1                   | 0                      | 0                       | 0                      |
| <b>Reported adverse effects</b>                                                      |                     |                        |                         |                        |
| Severe symptomatic hypotension                                                       | 0                   | 0                      | 0                       | 1                      |
| Mild symptomatic hypotension                                                         | 2                   | 1                      | 10                      | 4                      |
| Fatigue                                                                              | 1                   | 5                      | 3                       | 7                      |
| Malaise                                                                              | 2                   | 2                      | 1                       | 2                      |
| Headache                                                                             | 7                   | 7                      | 4                       | 3                      |
| Vertigo                                                                              | 2                   | 4                      | 4                       | 3                      |
| Visual complaint                                                                     | 1                   | 2                      | 0                       | 1                      |
| Dry mouth                                                                            | 1                   | 1                      | 2                       | 1                      |
| Itchiness                                                                            | 1                   | 1                      | 1                       | 0                      |
| Skin complaint                                                                       | 2                   | 0                      | 0                       | 1                      |
| Excessive sweating                                                                   | 0                   | 1                      | 0                       | 0                      |
| Dyspnoea                                                                             | 1                   | 2                      | 1                       | 0                      |
| Dry cough                                                                            | 3                   | 4                      | 2                       | 1                      |
| Lower respiratory tract infection                                                    | 1                   | 0                      | 1                       | 1                      |
| Palpitations                                                                         | 0                   | 0                      | 2                       | 1                      |
| Gastrointestinal complaints*                                                         | 1                   | 2                      | 7                       | 3                      |
| Pain                                                                                 | 5                   | 5                      | 4                       | 3                      |
| Myalgia                                                                              | 5                   | 5                      | 4                       | 6                      |
| Muscle spasm or cramp†                                                               | 3                   | 0                      | 1                       | 2                      |
| Arthritis including gout                                                             | 3                   | 3                      | 3                       | 2                      |
| Bursitis                                                                             | 0                   | 1                      | 1                       | 1                      |
| Micturition complaints including urinary tract infection                             | 2                   | 4                      | 1                       | 0                      |

---

|                       |   |   |   |   |
|-----------------------|---|---|---|---|
| Erectile dysfunction† | 1 | 0 | 0 | 0 |
|-----------------------|---|---|---|---|

---

Data represent numbers of patients with a particular adverse effect per study period. Some patients had more than one treatment-related adverse effect. \* Gastrointestinal complaints including heartburn, dyspepsia, constipation and diarrhoea. † Two patients had complaints possibly related to ramipril (muscle pain and erectile dysfunction) and switched to another ACEi (enalapril 40 mg/day and fosinopril 10 mg/day, resp.).

---

**Supplemental Table 3.** Clinical parameters during four treatment periods; *per protocol* analysis

|                                 | Regular sodium diet |                       | Sodium restriction diet |                       |
|---------------------------------|---------------------|-----------------------|-------------------------|-----------------------|
|                                 | Placebo<br>N= 31    | Paricalcitol<br>N= 34 | Placebo<br>N= 34        | Paricalcitol<br>N= 32 |
| <b>Plasma/Serum</b>             |                     |                       |                         |                       |
| Hb, mmol/L                      | 9.1 [8.8-9.4]       | 9.1 [8.9-9.4]         | 9.1 [8.8-9.4]           | 9.1 [8.8-9.4]         |
| Sodium, mmol/L                  | 140 [139-141]       | 140 [139-141]         | 140 [139-140]           | 140 [139-141]         |
| Potassium, mmol/L               | 4.3 [2.7-5.9]       | 4.2 [2.5-5.9]         | 4.4 [2.6-6.1]†          | 4.4 [3.1-5.6]†        |
| Calcium, mmol/L                 | 2.35 [2.09-2.60]    | 2.37 [2.13-2.61]      | 2.36 [2.14-2.59]        | 2.41 [1.75-3.07]*     |
| Phosphate, mmol/L               | 0.91 [0.85-0.98]    | 0.95 [0.90-1.01]*     | 0.93 [0.88-0.96]        | 0.97 [0.91-1.03]*     |
| Creatinine, µmol/L              | 112 [85-140]        | 114 [86-141]          | 112 [85-139]            | 121 [93-149]*††       |
| eGFR, ml/min/1.73m <sup>2</sup> | 68 [59-76]          | 66 [58-74]            | 67 [59-75]              | 62 [53-70]*††         |
| Albumin, g/L                    | 39 [37-41]          | 39 [38-41]            | 40 [38-41]              | 40 [38-41]*           |
| Total cholesterol, mmol/L       | 5.1 [4.7-5.5]       | 5.1 [4.7-5.6]         | 4.7 [4.3-5.1]*†         | 4.9 [4.5-5.4]††       |
| HDL cholesterol, mmol/L         | 1.4 [1.2-1.5]       | 1.3 [1.2-1.5]         | 1.3 [1.1-1.4]*†         | 1.3 [1.2-1.4]         |
| LDL cholesterol, mmol/L         | 3.0 [2.7-3.3]       | 3.0 [2.7-3.4]         | 2.8 [2.5-3.1]           | 2.9 [2.6-3.3]         |
| Renin, pg/mL                    | 44.0 [17.1-113.1]   | 48.6 [18.8-125.5]     | 60.3 [23.4-155.7]*†     | 62.7 [24.2-162.4]*†   |
| PTH, pmol/L                     | 5.3 [4.5-6.2]       | 3.6 [3.1-4.3]*        | 5.4 [4.7-6.3]†          | 3.4 [2.8-4.0]*†       |
| 25(OH)D, nmol/L                 | 53.5 [45.1-61.8]    | 52.2 [44.1-60.3]      | 52.6 [44.8-60.3]        | 58.0 [49.4-66.6]      |
| FGF23, RU/mL                    | 115 [100-132]       | 141 [120-166]*        | 123 [106-142]†          | 156 [130-188]*††      |
| <b>Urine</b>                    |                     |                       |                         |                       |
| Creatinine, mmol/24h            | 15.5 [14.2-16.9]    | 15.0 [13.8-16.3]      | 14.6 [13.3-15.8]        | 15.2 [14.1-16.4]      |
| Sodium, mmol/24h                | 187 [164-210]       | 183 [163-202]         | 105 [88-123]*†          | 112 [96-129]*†        |
| Urea, mmol/24h                  | 446 [402-490]       | 427 [383-471]         | 401 [359-443]*          | 422 [382-462]         |
| Potassium, mmol/24h             | 85 [76-94]          | 84 [75-93]            | 86 [76-97]              | 88 [77-98]            |
| Calcium, mmol/24h               | 3.2 [2.5-3.8]       | 5.1 [4.1-6.1]*        | 2.6 [1.8-3.4]†          | 4.5 [3.6-5.5]*†       |
| Phosphate, mmol/24h             | 33.8 [30.6-36.9]    | 33.9 [29.9-37.9]      | 32.6 [27.4-37.9]        | 32.0 [28.8-35.2]      |
| Albuminuria, mg/24h             | 1,177 [823-1,682]   | 1,082 [772-1,516]     | 804 [564-1,146]*†       | 690 [480-993]*††      |
| Proteinuria, g/24h              | 1.5 [1.1-2.1]       | 1.4 [1.0-1.9]         | 1.1 [0.8-1.5]*†         | 1.0 [0.7-1.3]*†       |
| Albumin/creatinine ratio        | 77 [54-109]         | 74 [52-103]           | 57 [40-81]*†            | 46 [32-67]*††         |
| Creatinine clearance, mL/min    | 105 [88-121]        | 98 [85-111]           | 97 [83-110]             | 93 [81-104]*          |
| <b>Other</b>                    |                     |                       |                         |                       |
| Systolic blood pressure, mmHg   | 129 [125-134]       | 125 [120-129]*        | 120 [116-125]*†         | 121 [116-125]*        |
| Diastolic blood pressure, mmHg  | 79 [76-82]          | 77 [73-81]            | 74 [70-77]*†            | 74 [70-77]*           |
| Mean arterial pressure, mmHg    | 96 [92-99]          | 93 [89-97]*           | 89 [86-93]*†            | 90 [86-93]*           |
| Heart rate, bpm                 | 65 [61-69]          | 66 [62-70]            | 66 [62-70]              | 64 [60-68]††          |
| Body weight, kg                 | 95 [89-101]         | 95 [89-100]           | 93 [87-98]*†            | 93 [87-98]*†          |

Data are presented as estimated mean [95% CI] or estimated geometric mean [95% CI] for normally or skewed distributed data, respectively. *P* value shows treatment effect by linear mixed modelling with centre, treatment, sequence and the interaction treatment\*sequence as fixed factors.

\**P*< 0.05 versus placebo on regular sodium diet

†*P*<0.05 versus paricalcitol on regular sodium diet

‡*P*<0.05 versus placebo on sodium restriction diet
